# Supplementary material for: Norovirus gastroenteritis general outbreak associated with raw shellfish consumption in South Italy
Source: Springer Nature journal article supplement (doi:10.1186/1471-2334-4-37), 2004-09-21

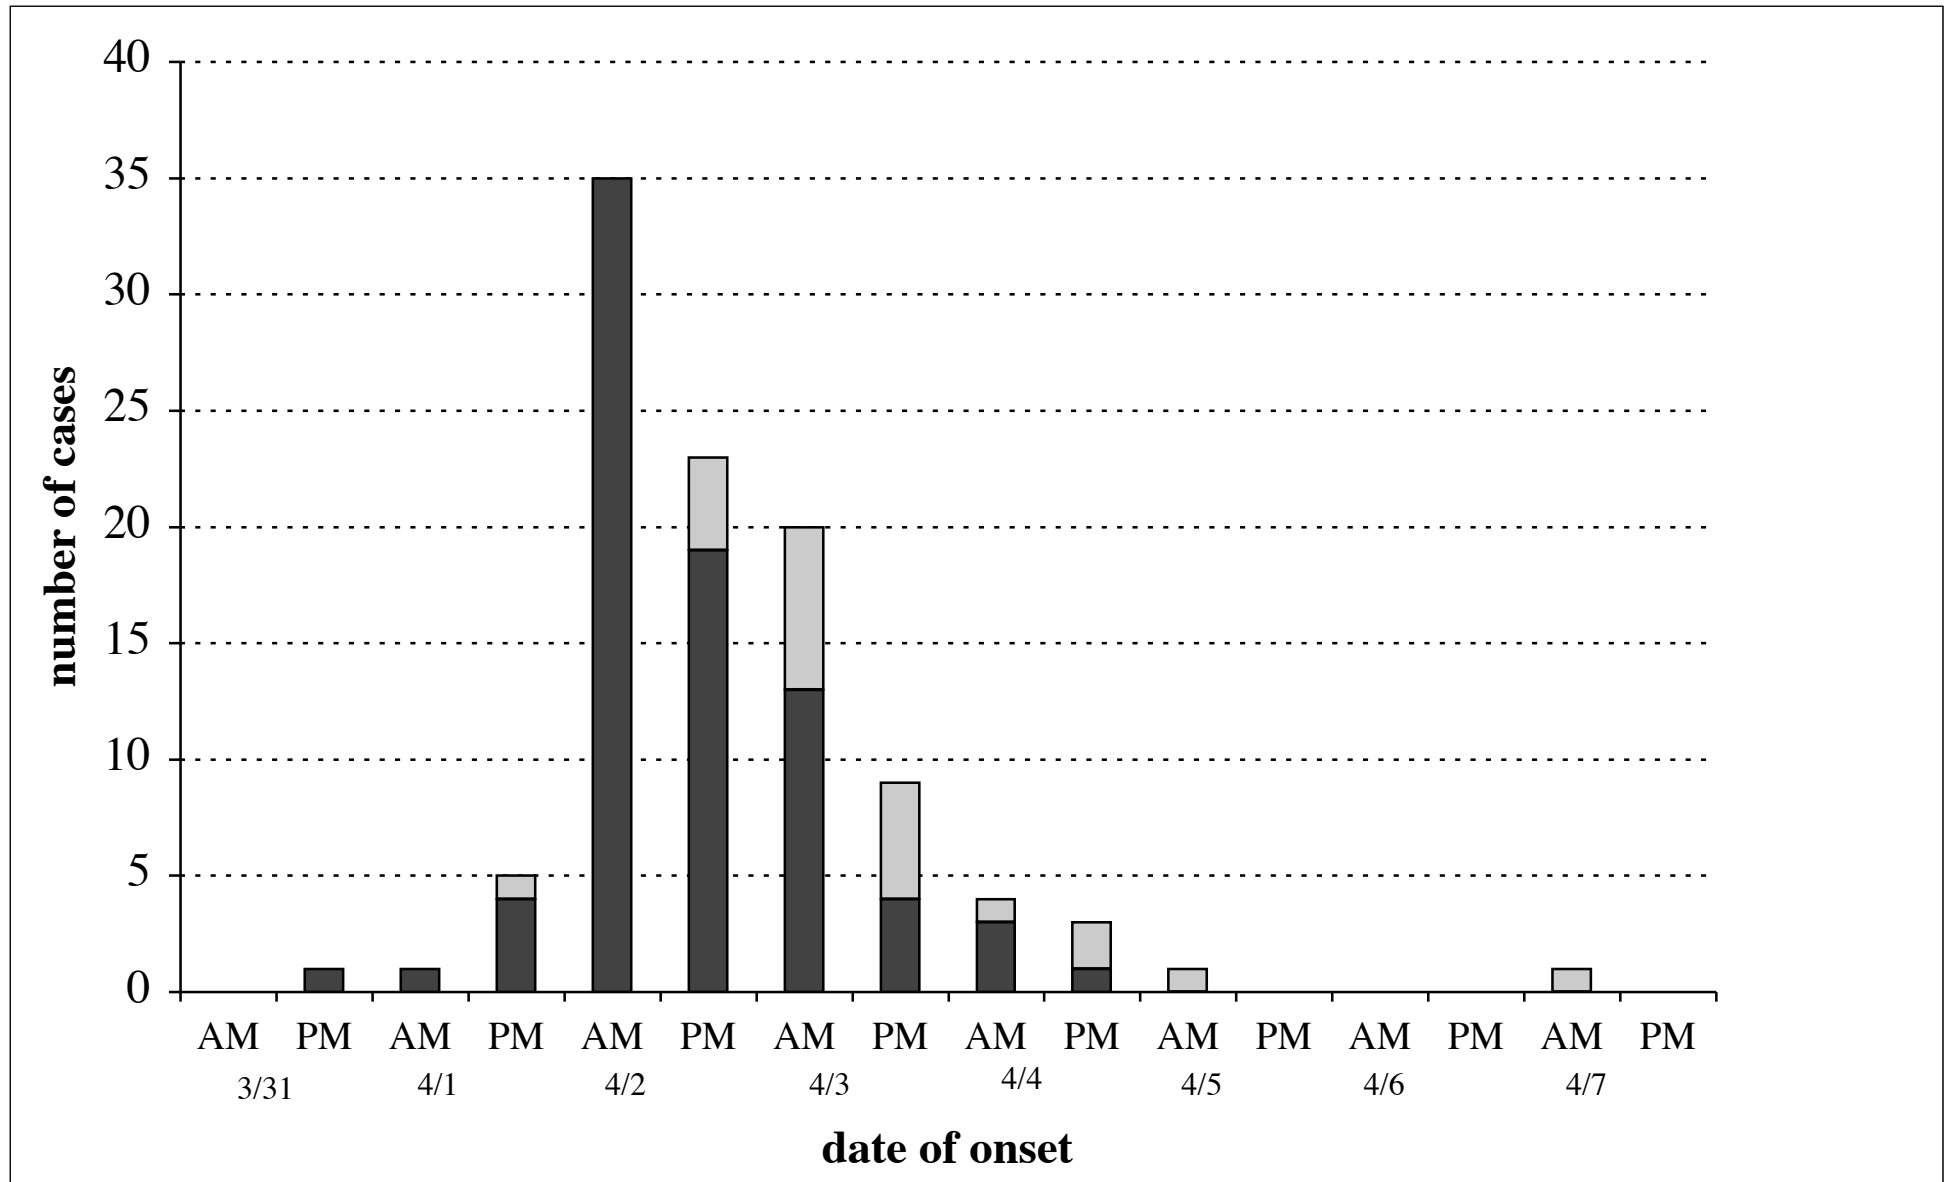

Supplement: 12879_2004_122_MOESM1_ESM.pdf [file 12879_2004_122_MOESM1_ESM.pdf]
